# Supplementary material
Source: Springer Nature journal article supplement (https://www.springermedizin.de/resource/supplementary/12903_2014_392_MOESM1_ESM.pdf/9516936)

**Appendix 1**  
Search strategy

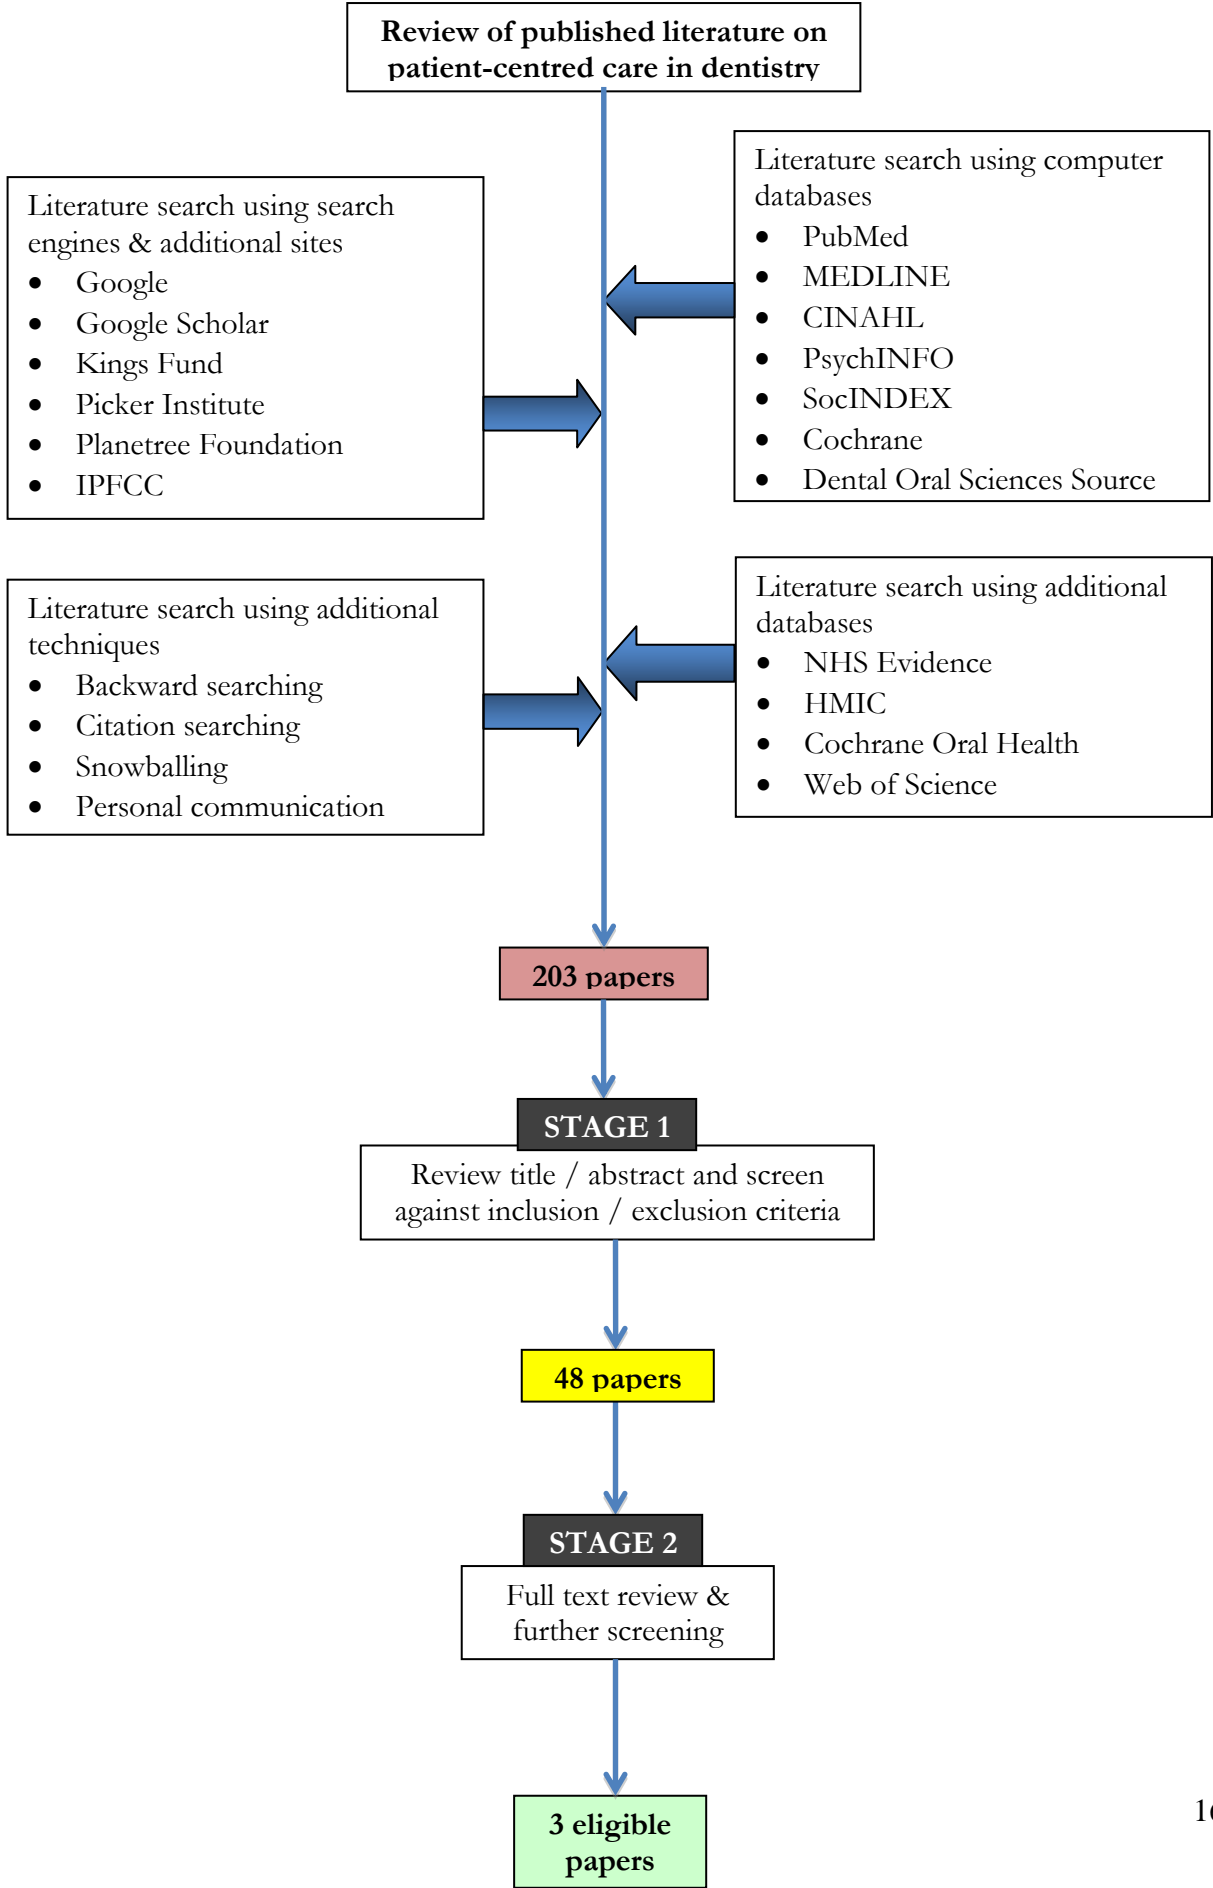

Supplement: MOESM1 [file 9516936]
